# Supplementary material for: Purification and biological activity of natural variants synthesized by tridecaptin M gene cluster and in vitro drug-kinetics of this antibiotic class
Source: PubMed Central journal article supplement (PMC6906472; doi:10.1038/s41598-019-54716-8), 2019-12-11
Supplement: 41598_2019_54716_MOESM1_ESM.pdf [file 41598_2019_54716_MOESM1_ESM.pdf]

## Supplementary information

### **Purification and biological activity of natural variants synthesized by tridecaptin M gene cluster and *in vitro* drug-kinetics of this antibiotic class**

Manoj Jangra, Manpreet Kaur, Mansi Podia, Rushikesh Tambat, Vidhu Singh, Nishtha Chandal, Nisha Mahey, Navdezda Maurya, Hemraj Nandanwar\*

Clinical Microbiology & Bioactive Screening Laboratory, CSIR-Institute of Microbial Technology, Sector -39A, Chandigarh, 160036, India

#### **\*Address for correspondence**

Dr Hemraj Nandanwar

Clinical Microbiology & Bioactive Screening Laboratory, CSIR - Institute of Microbial Technology, Sector -39A, Chandigarh, India, 160 036

E-mail: [hemraj@imtech.res.in](mailto:hemraj@imtech.res.in)

Telephone: +91-172-6665338 Fax: +91-172-2690585/2690632

## Supplementary Tables

**Table S1** Mass spectrometric data of different variants of tridecaptin M

| Peptide variant       | Molecular formula [M+H] <sup>+</sup>                             | Observed molecular weight [M+H] <sup>+</sup> | Calculated monoisotopic mass [M+H] <sup>+</sup> | Error (ppm) |
|-----------------------|------------------------------------------------------------------|----------------------------------------------|-------------------------------------------------|-------------|
| M <sub>1</sub> (or M) | C <sub>68</sub> H <sub>114</sub> N <sub>17</sub> O <sub>20</sub> | 1488.8246                                    | 1488.8426                                       | 18.0        |
| M <sub>2</sub>        | C <sub>66</sub> H <sub>110</sub> N <sub>17</sub> O <sub>20</sub> | 1460.8090                                    | 1460.8113                                       | 2.0         |
| M <sub>3</sub>        | ND                                                               | 1482.6736                                    | ND                                              | ND          |
| M <sub>4</sub>        | ND                                                               | 1460.6866                                    | ND                                              | ND          |
| M <sub>5</sub>        | C <sub>65</sub> H <sub>111</sub> N <sub>16</sub> O <sub>20</sub> | 1435.8076                                    | 1435.8160                                       | 8.0         |
| M <sub>6</sub>        | C <sub>67</sub> H <sub>112</sub> N <sub>17</sub> O <sub>20</sub> | 1474.7987                                    | 1474.8269                                       | 28.0        |
| M <sub>7</sub>        | C <sub>67</sub> H <sub>112</sub> N <sub>17</sub> O <sub>20</sub> | 1474.8167                                    | 1474.8269                                       | 10.0        |
| M <sub>8</sub>        | C <sub>66</sub> H <sub>113</sub> N <sub>16</sub> O <sub>20</sub> | 1449.7800                                    | 1449.8317                                       | 51.0        |
| M <sub>9</sub>        | ND                                                               | 1607.7673                                    | ND                                              | ND          |
| M <sub>10</sub>       | ND                                                               | 1563.8605                                    | ND                                              | ND          |
| M <sub>11</sub>       | ND                                                               | 1569.8368                                    | ND                                              | ND          |

**Table S2** Synergistic activity of M<sub>11</sub> with efflux pump inhibitor, CCCP

| Strains                                   | Intrinsic Activity; MIC (μg/ml) |      | MIC (μg/ml) of Tri-M <sub>11</sub> in the presence of CCCP |                       | FICI                  |                       |
|-------------------------------------------|---------------------------------|------|------------------------------------------------------------|-----------------------|-----------------------|-----------------------|
|                                           | Tri-M <sub>11</sub>             | CCCP | 1/4 <sup>th</sup> MIC                                      | 1/8 <sup>th</sup> MIC | 1/4 <sup>th</sup> MIC | 1/8 <sup>th</sup> MIC |
| <i>Acinetobacter baumannii</i> ATCC 19606 | 4                               | 64   | 1                                                          | 2                     | 0.5                   | 0.625                 |
| <i>Klebsiella pneumoniae</i> GMCH 13      | 4                               | 32   | 2                                                          | 2                     | 0.75                  | 0.625                 |
| <i>Klebsiella pneumoniae</i> GMCH 15      | 2                               | 64   | 2                                                          | 2                     | -                     | -                     |

## Supplementary Figures

Sample Name : M152-P3 actual 32ug/ml (XBridge C18 1 ml/min)  
Sample ID : 10-30%ACN/Water 0.075% TFA  
Vial# : 157  
Injection Volume : 50 uL  
Data Filename : Sample\_133.lcd  
Method Filename : manoj.lcm  
Batch Filename :  
Date Acquired : 3/20/2019 8:38:29 PM  
Data Processed : 4/3/2019 3:11:25 PM

### <Chromatogram>

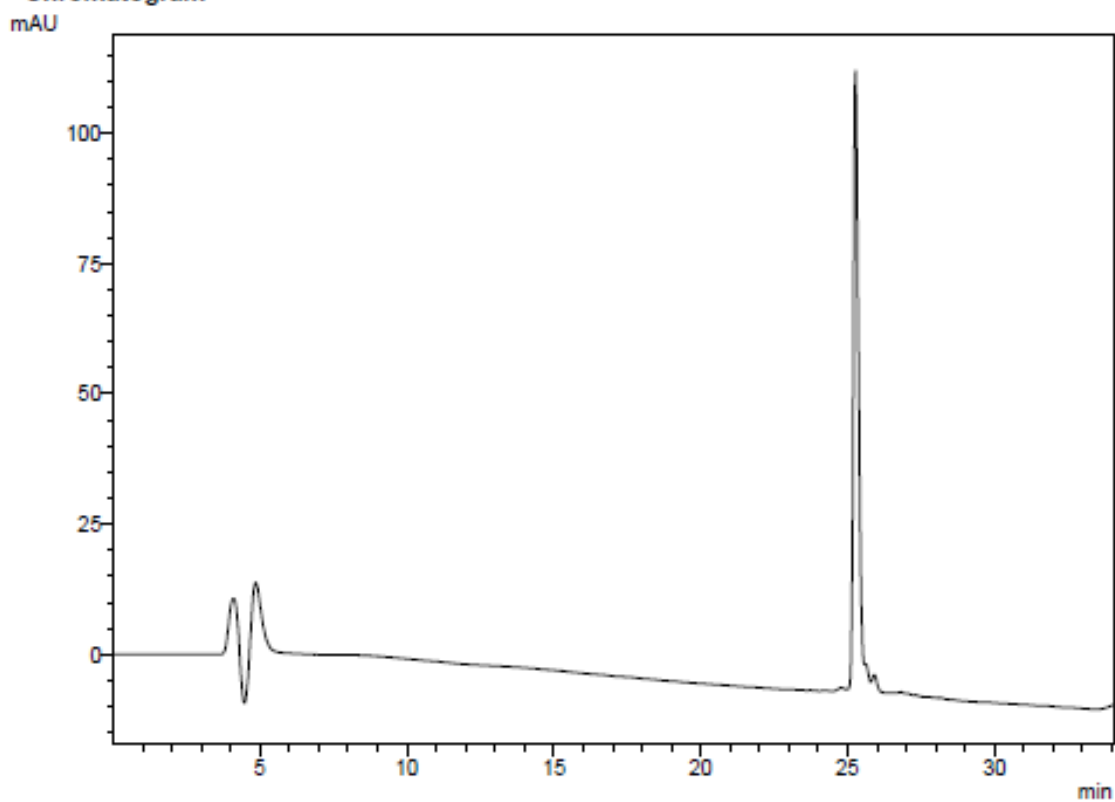

**Figure S1** HPLC chromatogram of purified M<sub>1</sub> (The originally described major product of tridecaptin M). The peaks at 5 min in this chromatogram or other HPLC profiles belong to solvent.

Sample Name : M152-P1 pure (XBridgeC18, 1.0 ml/min)  
Sample ID : 10-35%ACN/20%ACN0.075%TFA  
Vial# : 151  
Injection Volume : 30 uL  
Data Filename : Sample\_322.lcd  
Method Filename : manoj.lcm  
Batch Filename :  
Date Acquired : 4/19/2019 12:52:39 PM  
Data Processed : 4/19/2019 2:27:21 PM

<Chromatogram>

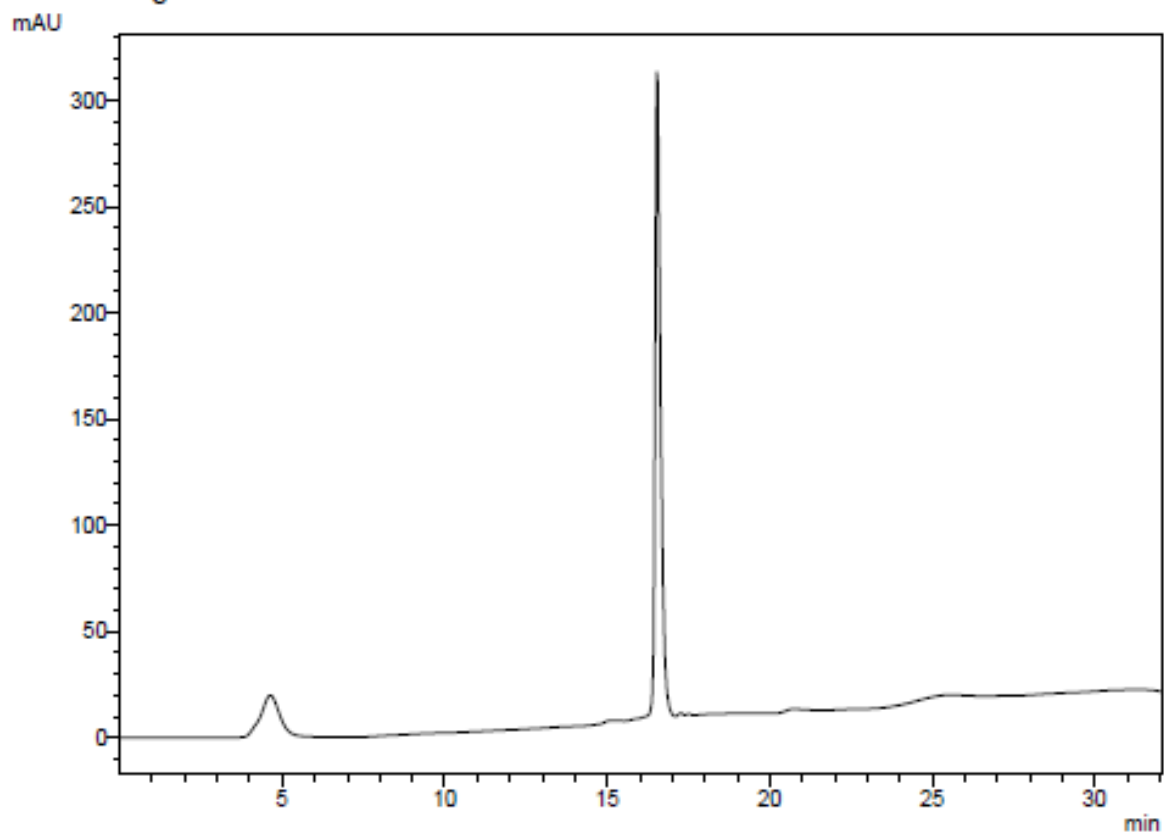

**Figure S2** HPLC chromatogram of purified M<sub>2</sub>

Sample Name : M152-F3(1) pure (XBridgeC18, 1.0 ml/min)  
Sample ID : 10-35%ACN/20%ACN0.075%TFA  
Vial# : 151  
Injection Volume : 30 uL  
Data Filename : Sample\_323.lcd  
Method Filename : manoj.lcm  
Batch Filename :  
Date Acquired : 4/19/2019 1:25:58 PM  
Data Processed : 4/19/2019 2:28:23 PM

<Chromatogram>

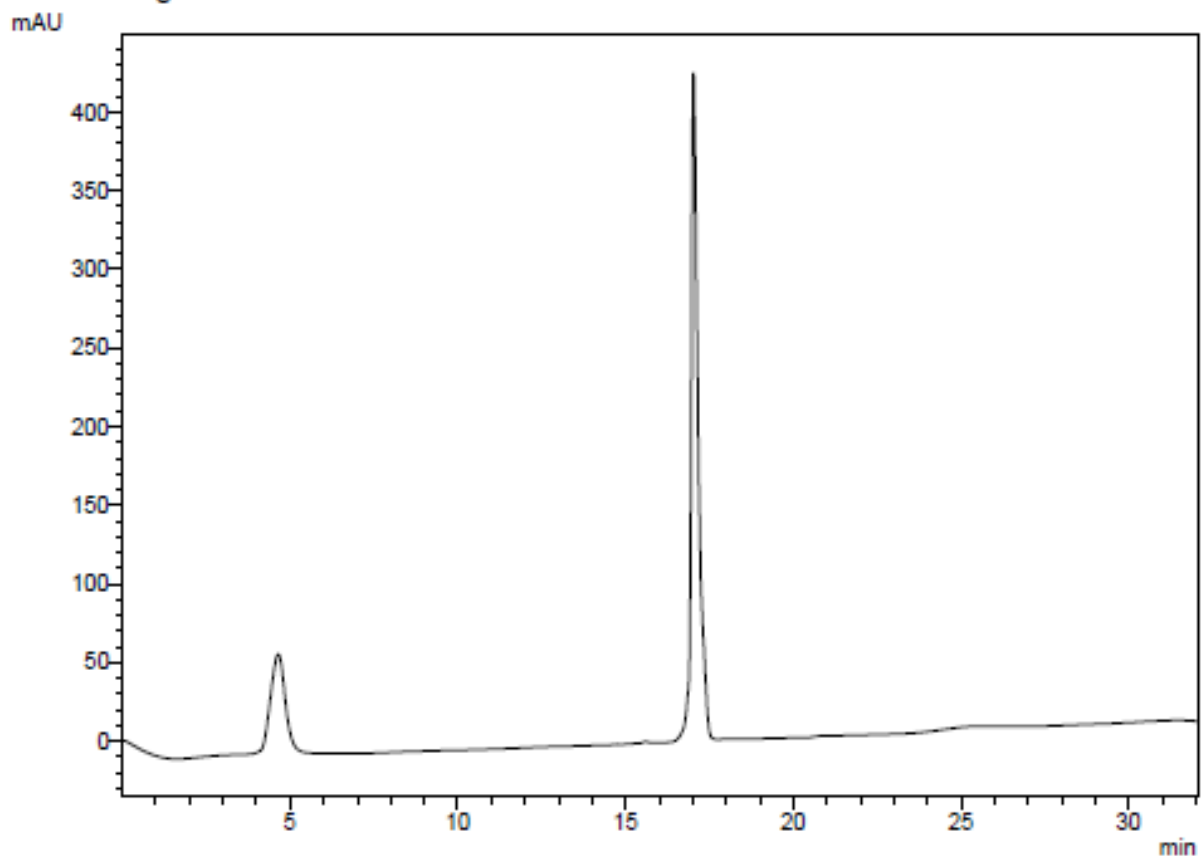

Figure S3 HPLC chromatogram of purified M<sub>3</sub>

Sample Name : M152-F3(2) pure (XBridgeC18, 1.0 ml/min)  
Sample ID : 10-35%ACN/20%ACN0.075%TFA  
Vial# : 151  
Injection Volume : 30 uL  
Data Filename : Sample\_324.lcd  
Method Filename : manoj.lcm  
Batch Filename :  
Date Acquired : 4/19/2019 2:08:58 PM  
Data Processed : 4/19/2019 2:41:03 PM

<Chromatogram>

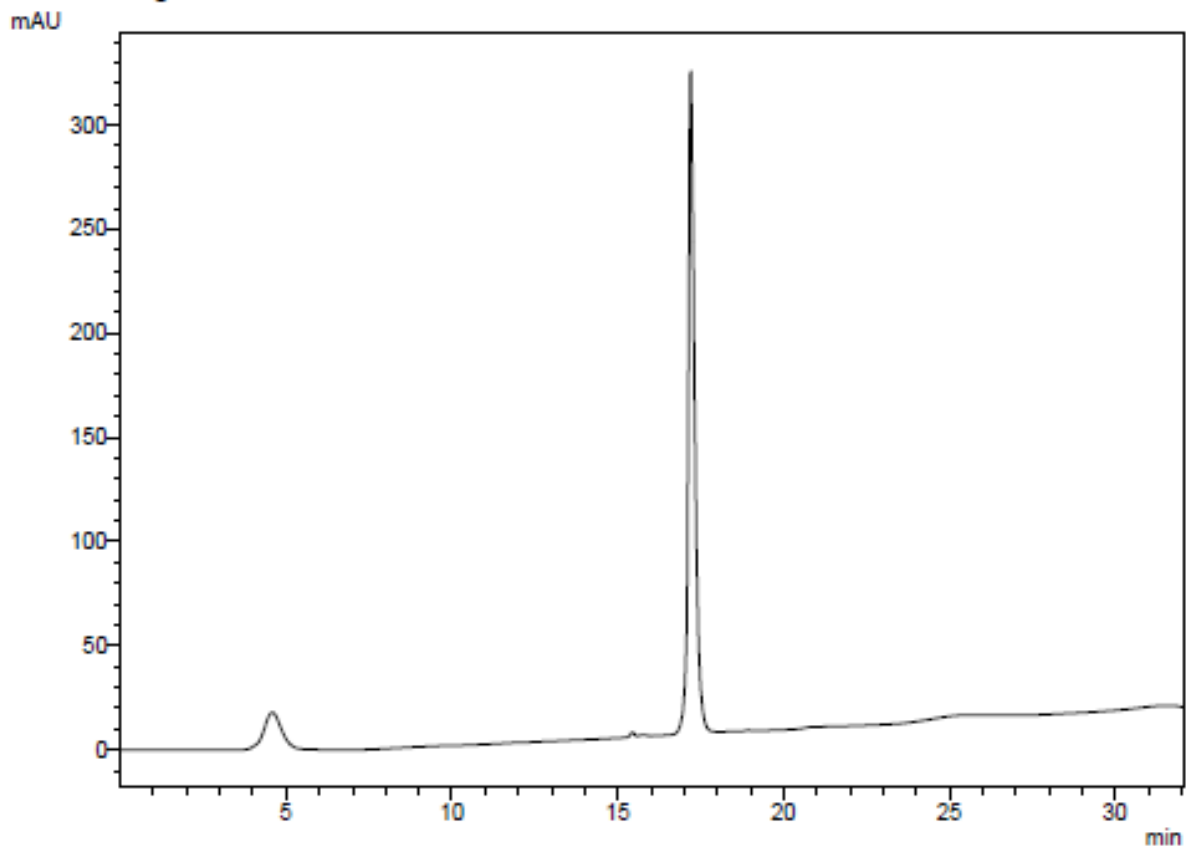

**Figure S4** HPLC chromatogram of purified M<sub>4</sub>

Sample Name : M152-F4 pure (XBridgeC18, 1.0 ml/min)  
Sample ID : 10-35%ACN/20%ACN0.075%TFA  
Vail# : 151  
Injection Volume : 30 uL  
Data Filename : Sample\_325.lcd  
Method Filename : manoj.lcm  
Batch Filename :  
Date Acquired : 4/19/2019 2:47:55 PM  
Data Processed : 4/19/2019 3:20:00 PM

<Chromatogram>

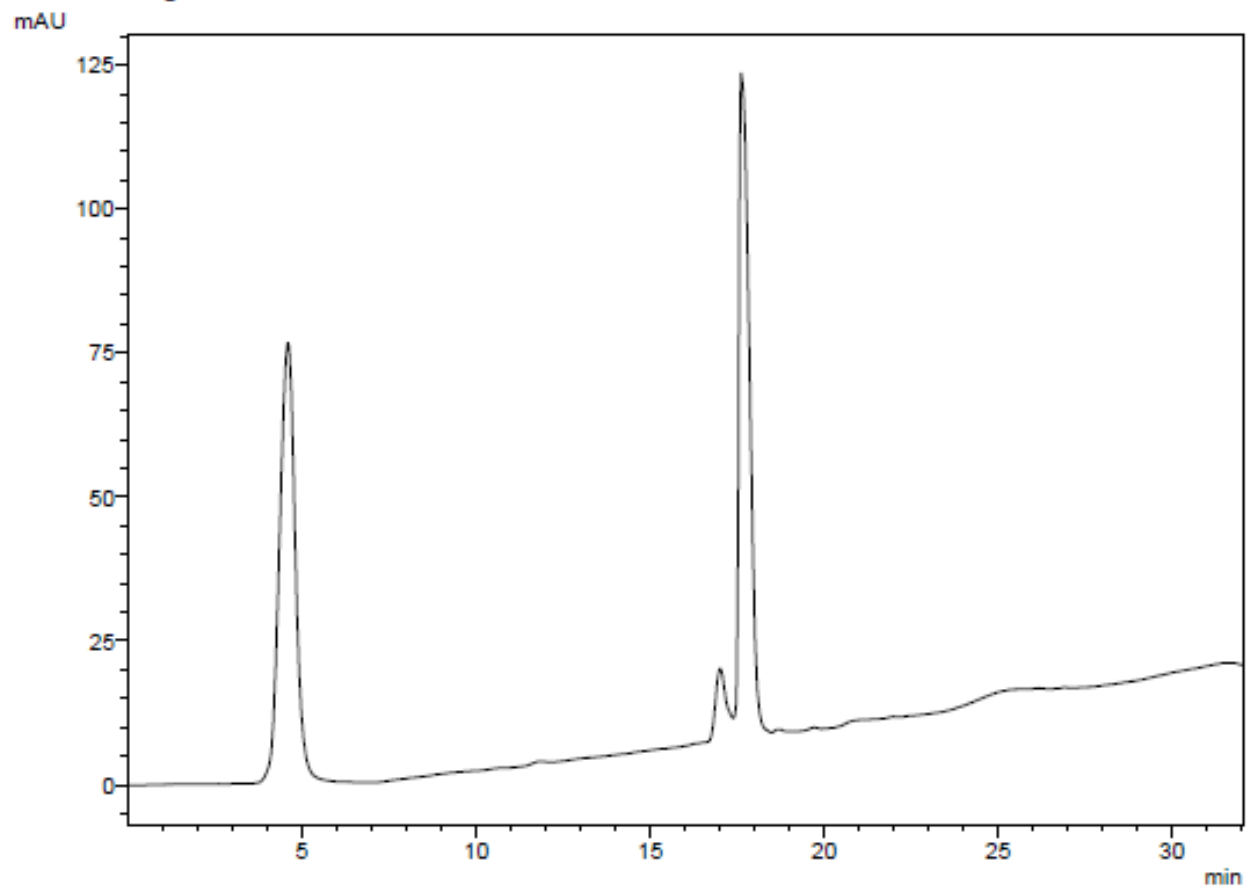

Figure S5 HPLC chromatogram of purified M<sub>5</sub>

Sample Name : P5-2 M152-P3 (Phenomenex C4 1.0ml/min)  
Sample ID : 3-35%ACN/Water 0.075%TFA  
Vail# : 153  
Injection Volume : 100 uL  
Data Filename : Sample\_195.lcd  
Method Filename : manoj.lcm  
Batch Filename :  
Date Acquired : 3/30/2019 5:48:03 PM  
Data Processed : 3/30/2019 7:38:04 PM

<Chromatogram>

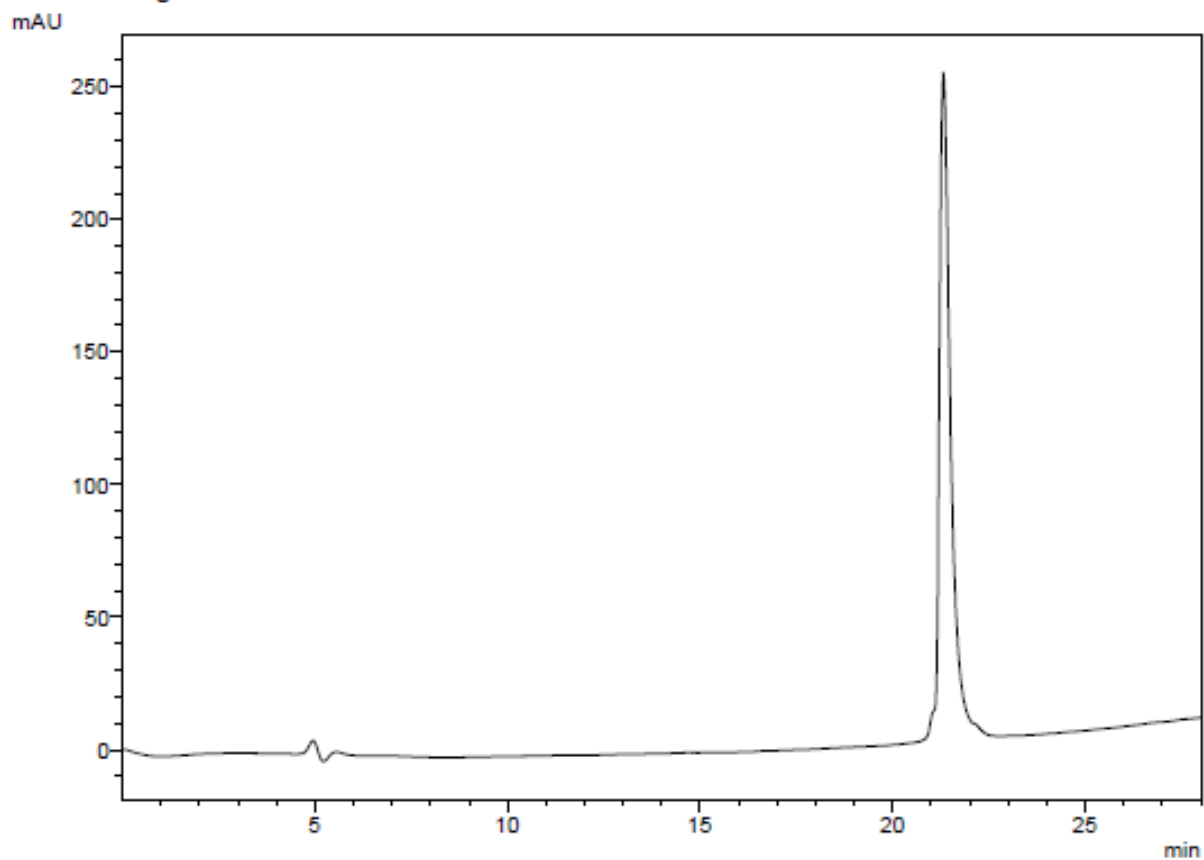

**Figure S6** HPLC chromatogram of purified M<sub>6</sub>



Sample Name : M152-P8 pure (Xbridge C18 1.0ml/min)  
Sample ID : 10-28%ACN/water 0.075%TFA  
Vail# : 151  
Injection Volume : 30 uL  
Data Filename : Sample\_233.Jcd  
Method Filename : manoj.lcm  
Batch Filename :  
Date Acquired : 4/3/2019 7:22:12 PM  
Data Processed : 4/10/2019 7:29:43 PM

<Chromatogram>

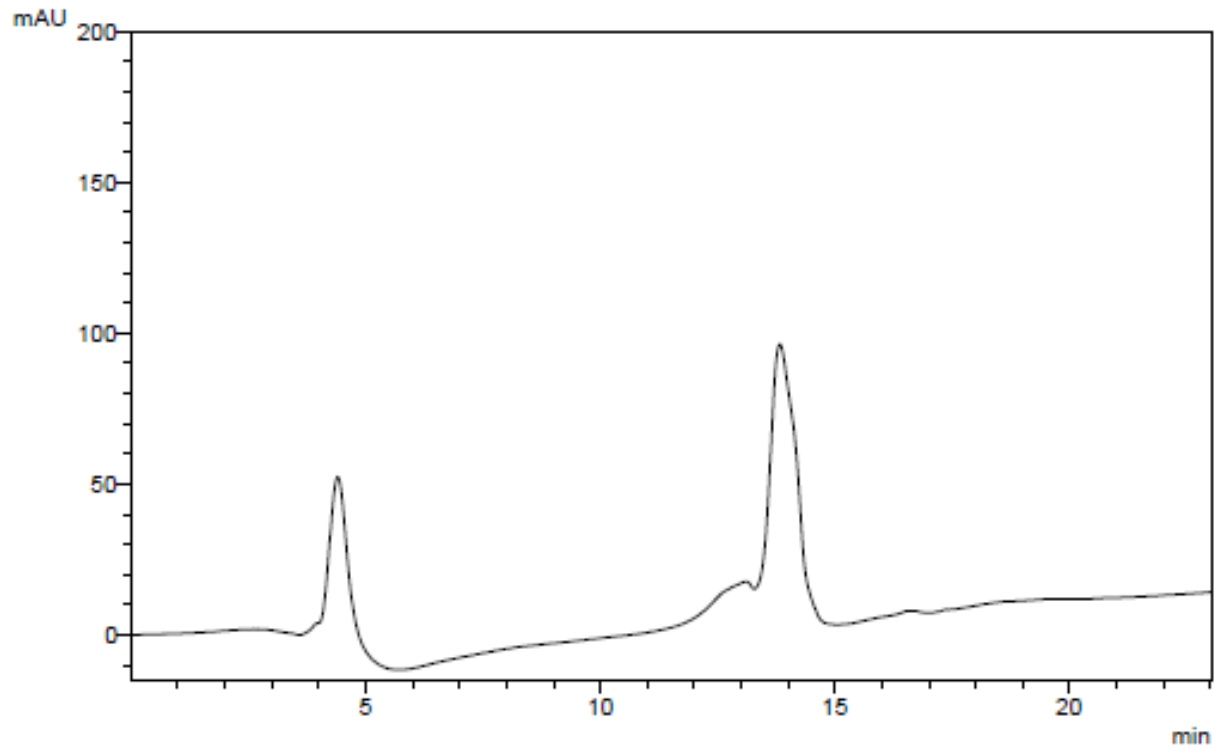

**Figure S7** HPLC chromatogram of purified M<sub>7</sub>

Sample Name : P7  
Sample ID : Unknown conc  
Vail# : 152  
Injection Volume : 30 uL  
Data Filename : Sample\_116.lcd  
Method Filename : manoj.lcm  
Batch Filename : Manoj Q.lcb  
Date Acquired : 3/15/2019 9:24:43 PM  
Data Processed : 10/18/2019 3:28:18 PM

<Chromatogram>

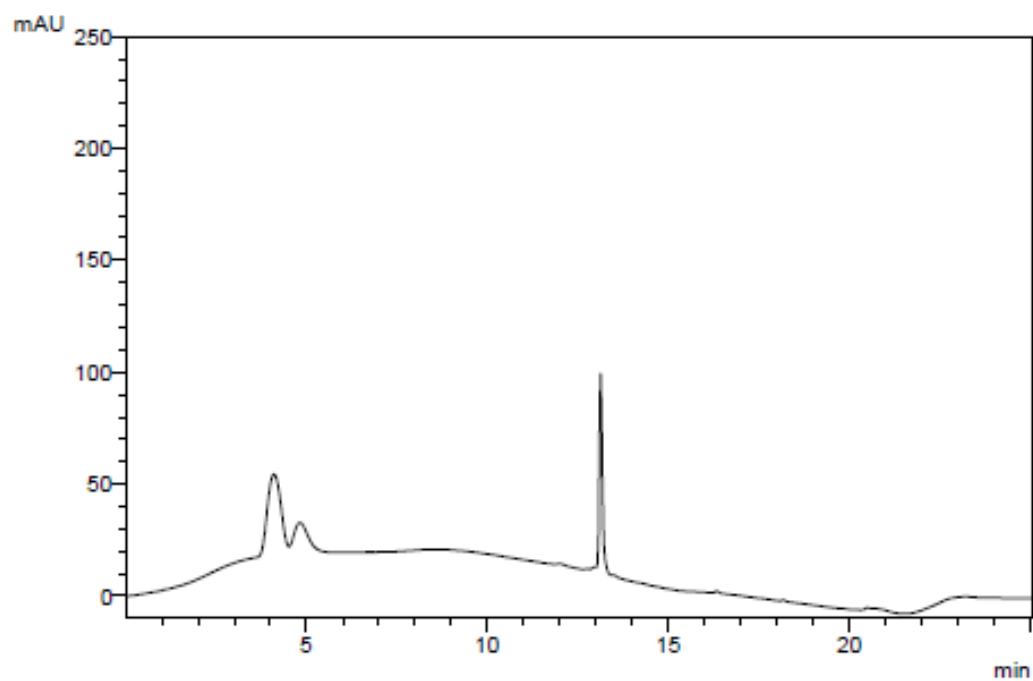

**Figure S8** HPLC chromatogram of purified M<sub>8</sub>

Sample Name : M152-P10 pure (XBridgeC18, 1.0 ml/min)  
Sample ID : 10-35%ACN/20%ACN0.075%TFA  
Vail# : 151  
Injection Volume : 30 uL  
Data Filename : Sample\_326.lcd  
Method Filename : manoj.lcm  
Batch Filename :  
Date Acquired : 4/19/2019 3:30:34 PM  
Data Processed : 4/19/2019 4:08:06 PM

<Chromatogram>

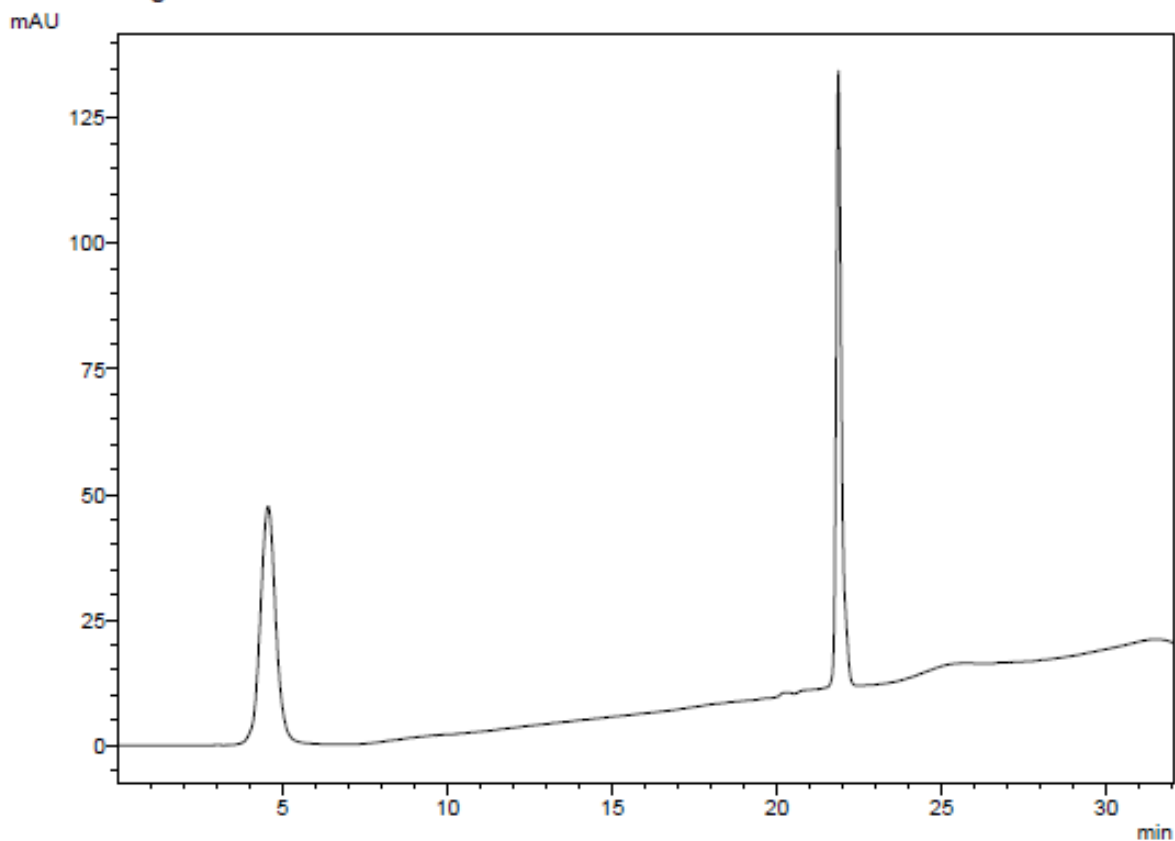

Figure S9 HPLC chromatogram of purified M<sub>10</sub>

Sample Name : M152-P11 pure (XBridgeC18, 1.0 ml/min)  
Sample ID : 10-35%ACN/20%ACN0.075%TFA  
Vial# : 151  
Injection Volume : 30 uL  
Data Filename : Sample\_388.lcd  
Method Filename : manoj.lcm  
Batch Filename :  
Date Acquired : 4/22/2019 8:33:13 PM  
Data Processed : 4/29/2019 1:40:47 PM

<Chromatogram>

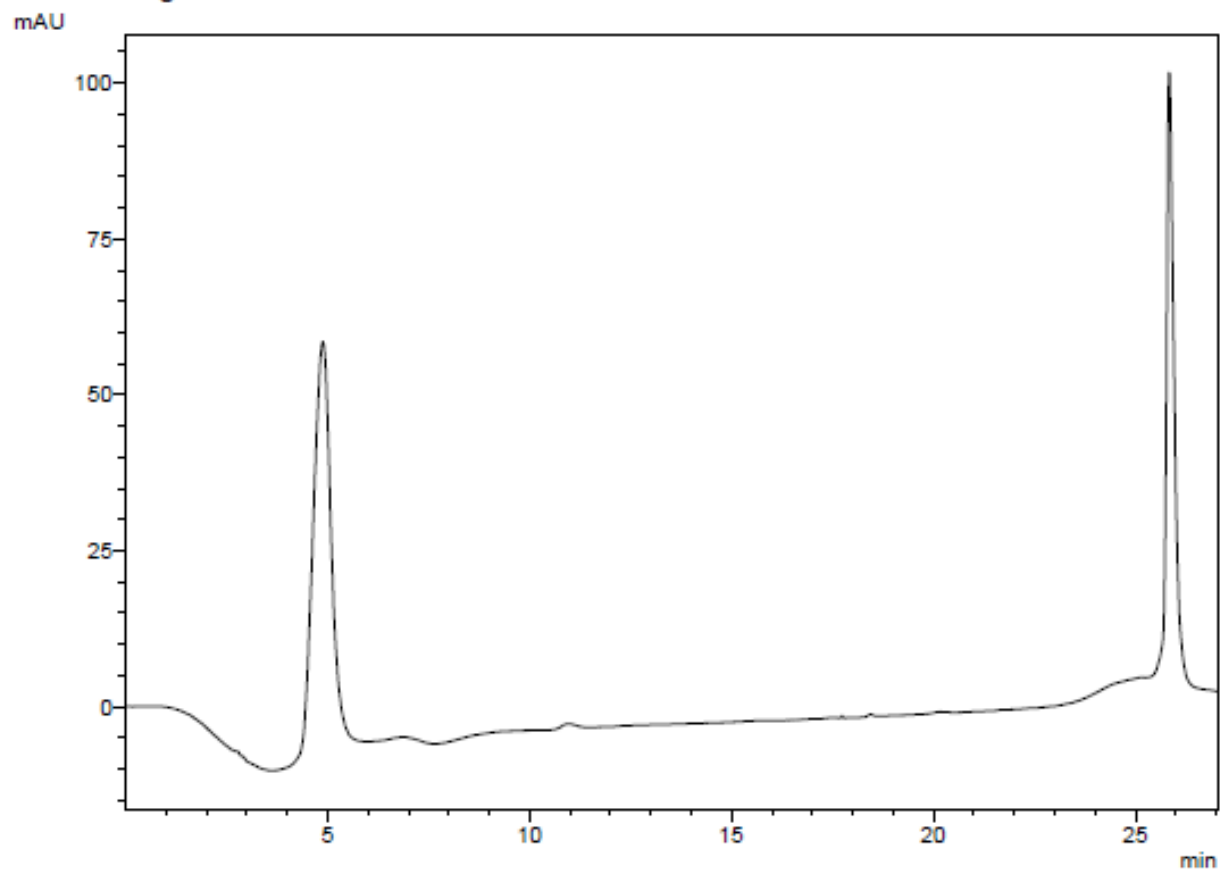

**Figure S10** HPLC chromatogram of purified M<sub>11</sub>

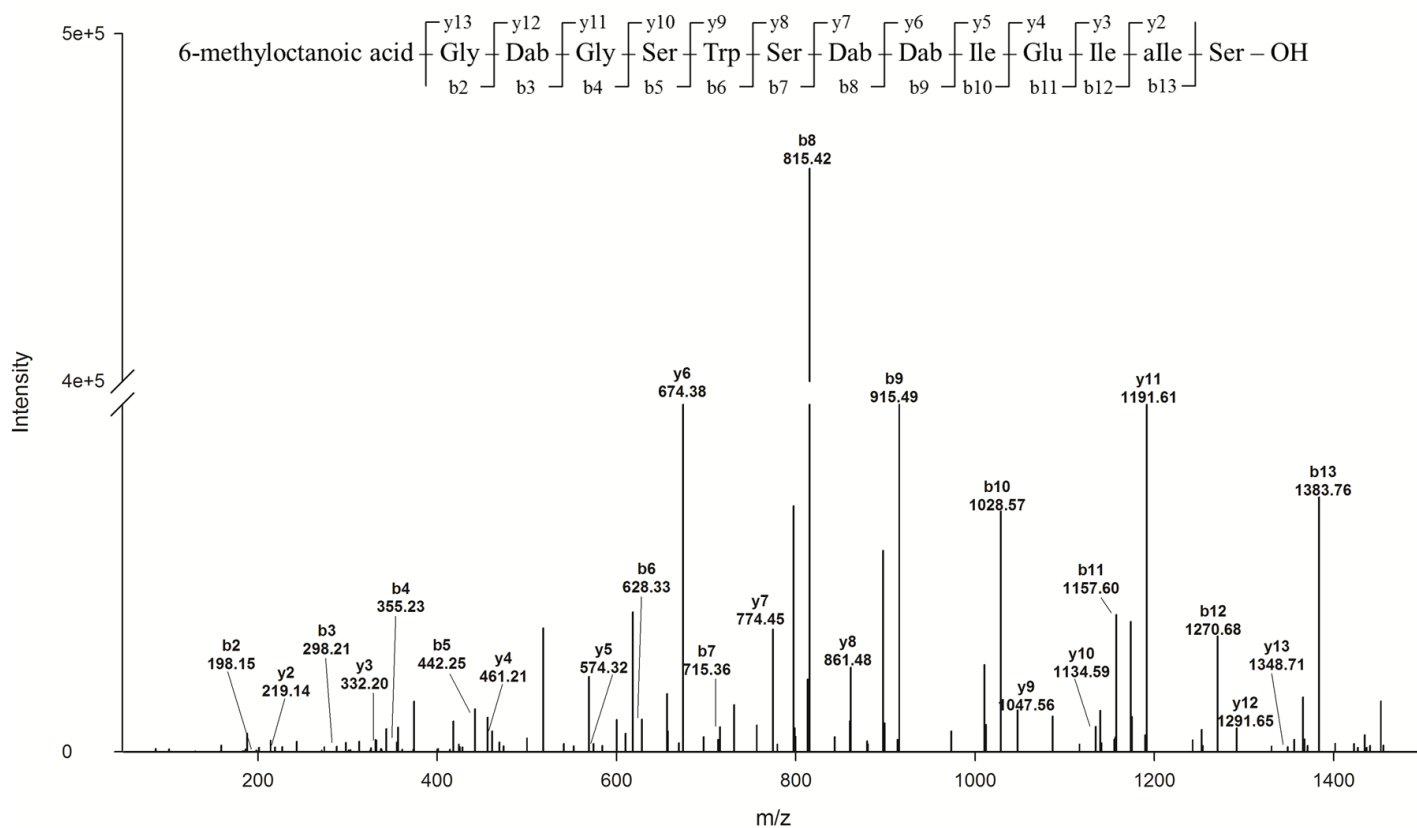

**Figure S11** Tandem MS spectroscopic data of tridecaptin M (or M<sub>1</sub>). This data is already published by our group in original research paper on tridecaptin M<sup>1</sup>. The MS/MS data of rest of the variants was analyzed relative to this spectrum.

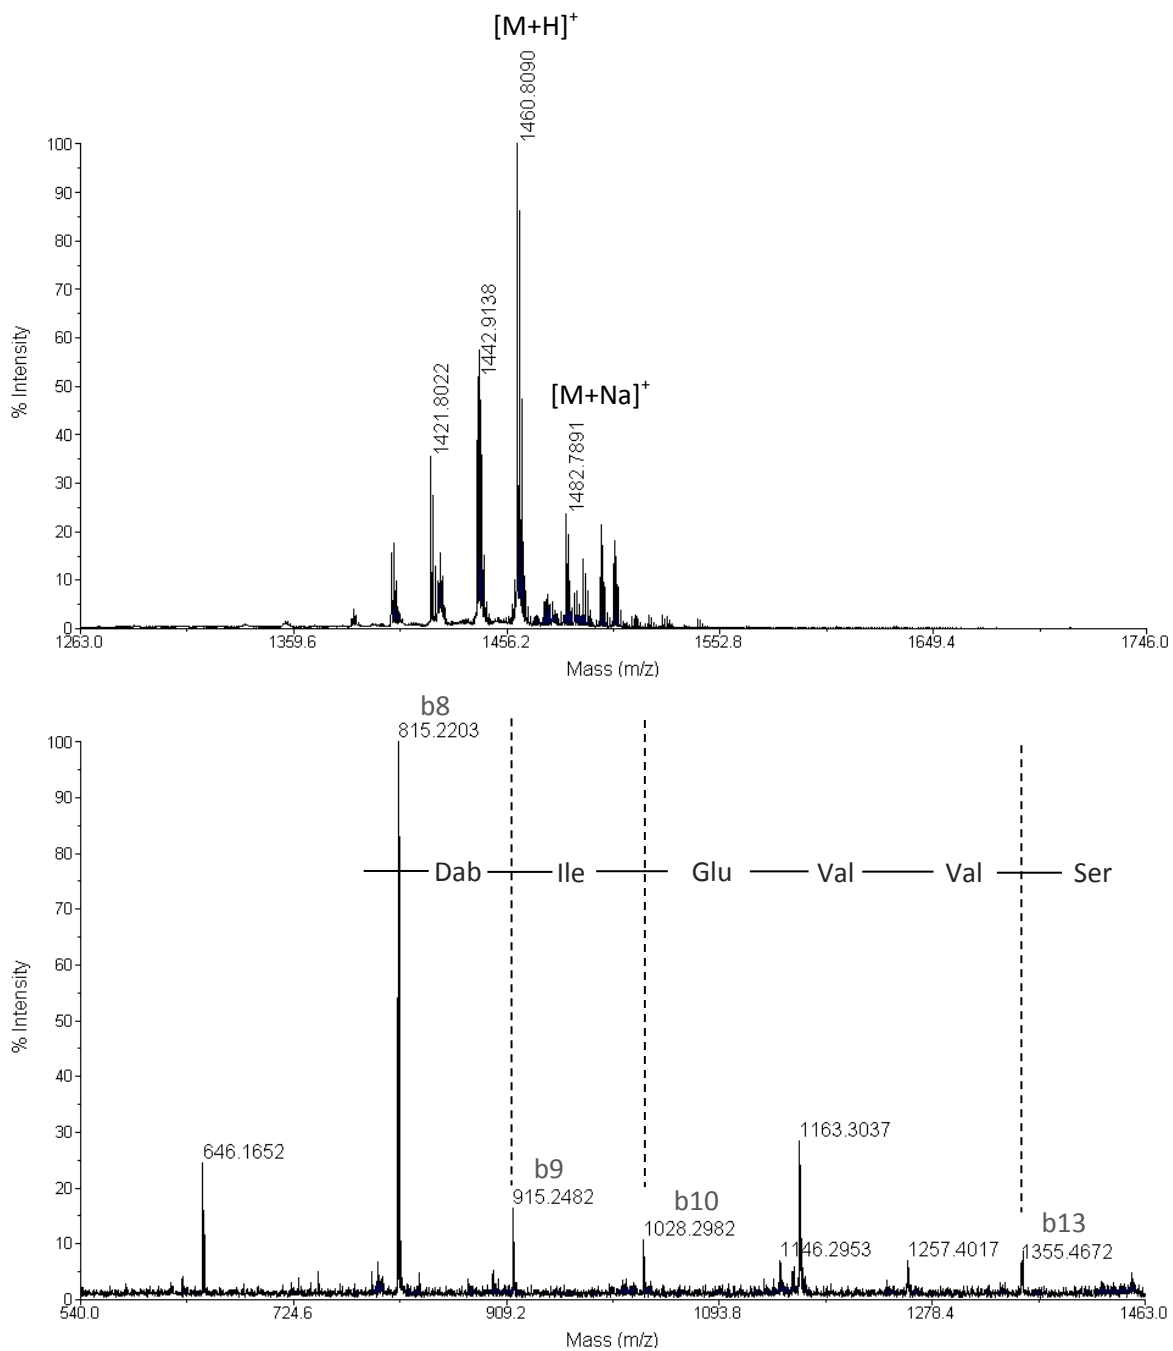

**Figure S12** Mass spectroscopic data of M<sub>2</sub>. Top, MS data; bottom, MS/MS spectrum

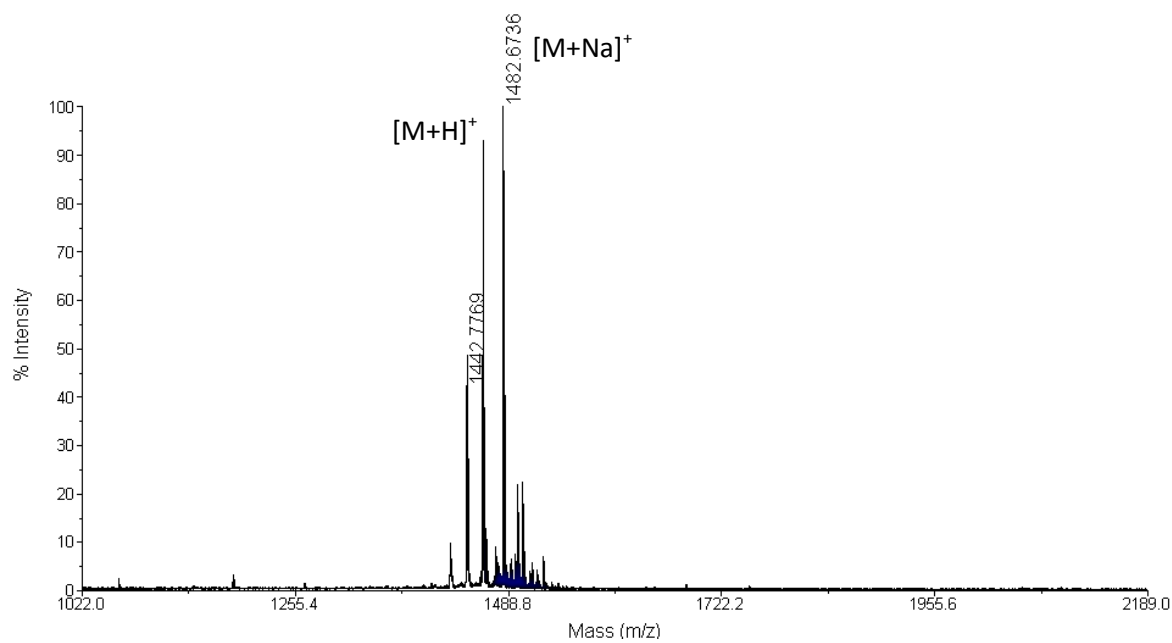

**Figure S13** Mass spectroscopic data of  $M_3$

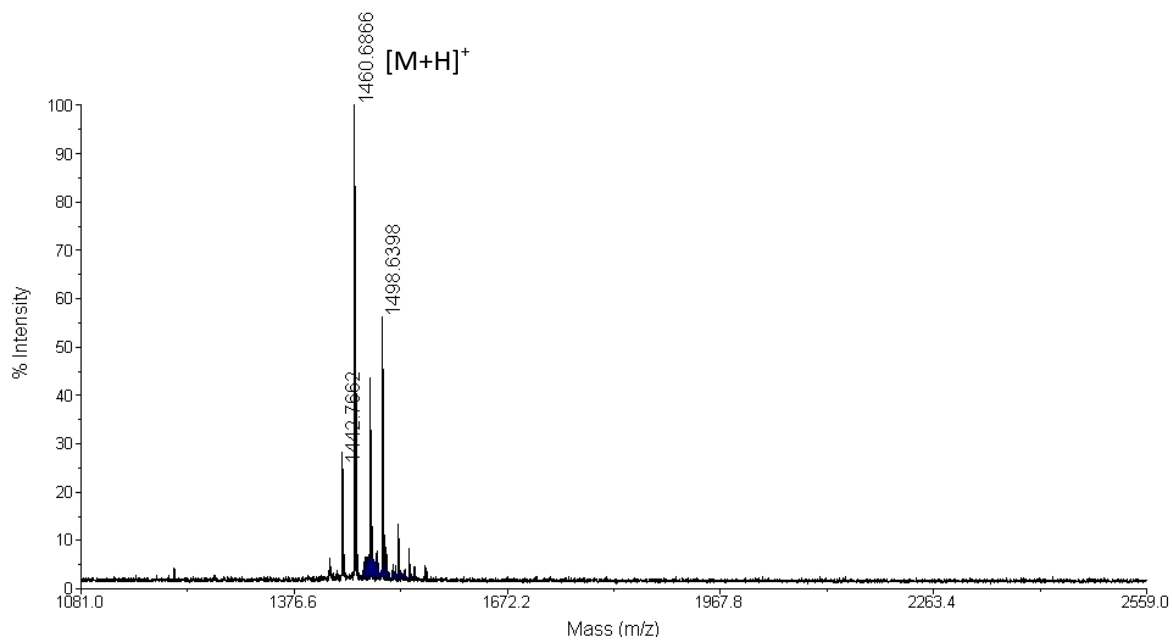

**Figure S14** Mass spectroscopic data of  $M_4$

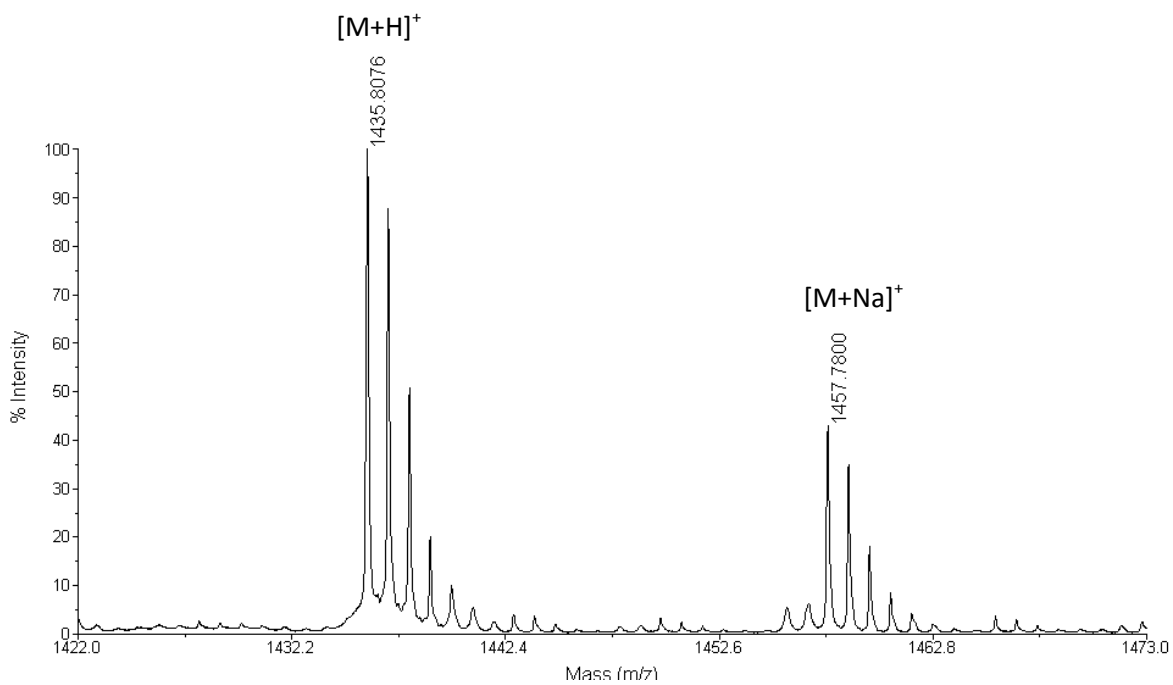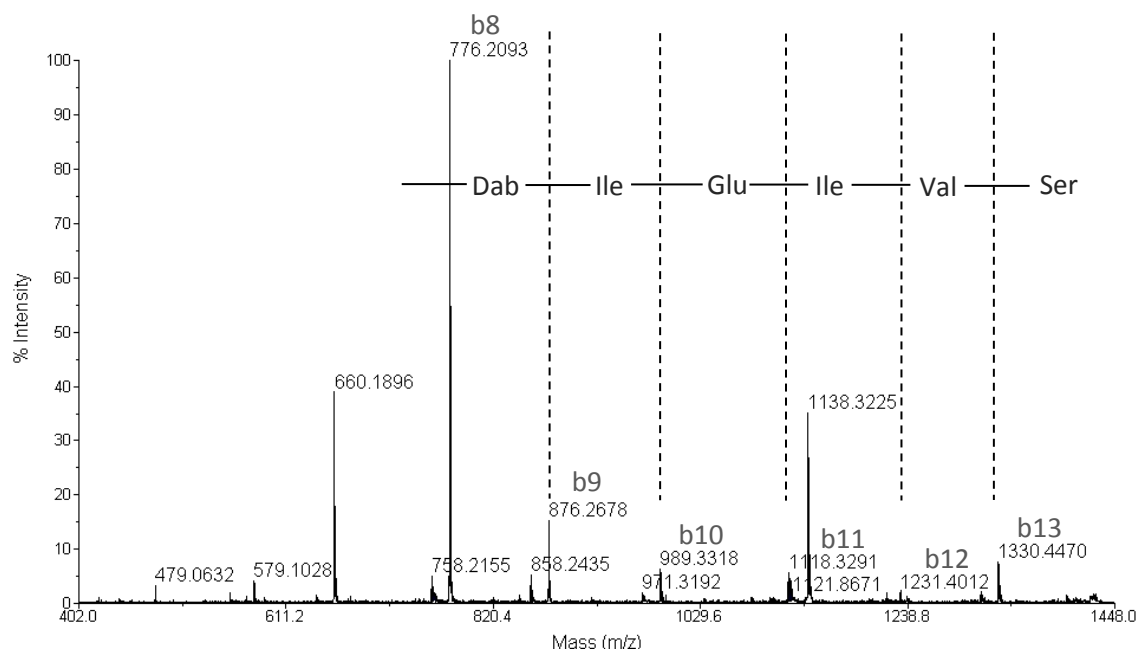

**Figure S15** Mass spectroscopic data of M<sub>5</sub>. Top, MS data; bottom, MS/MS spectrum



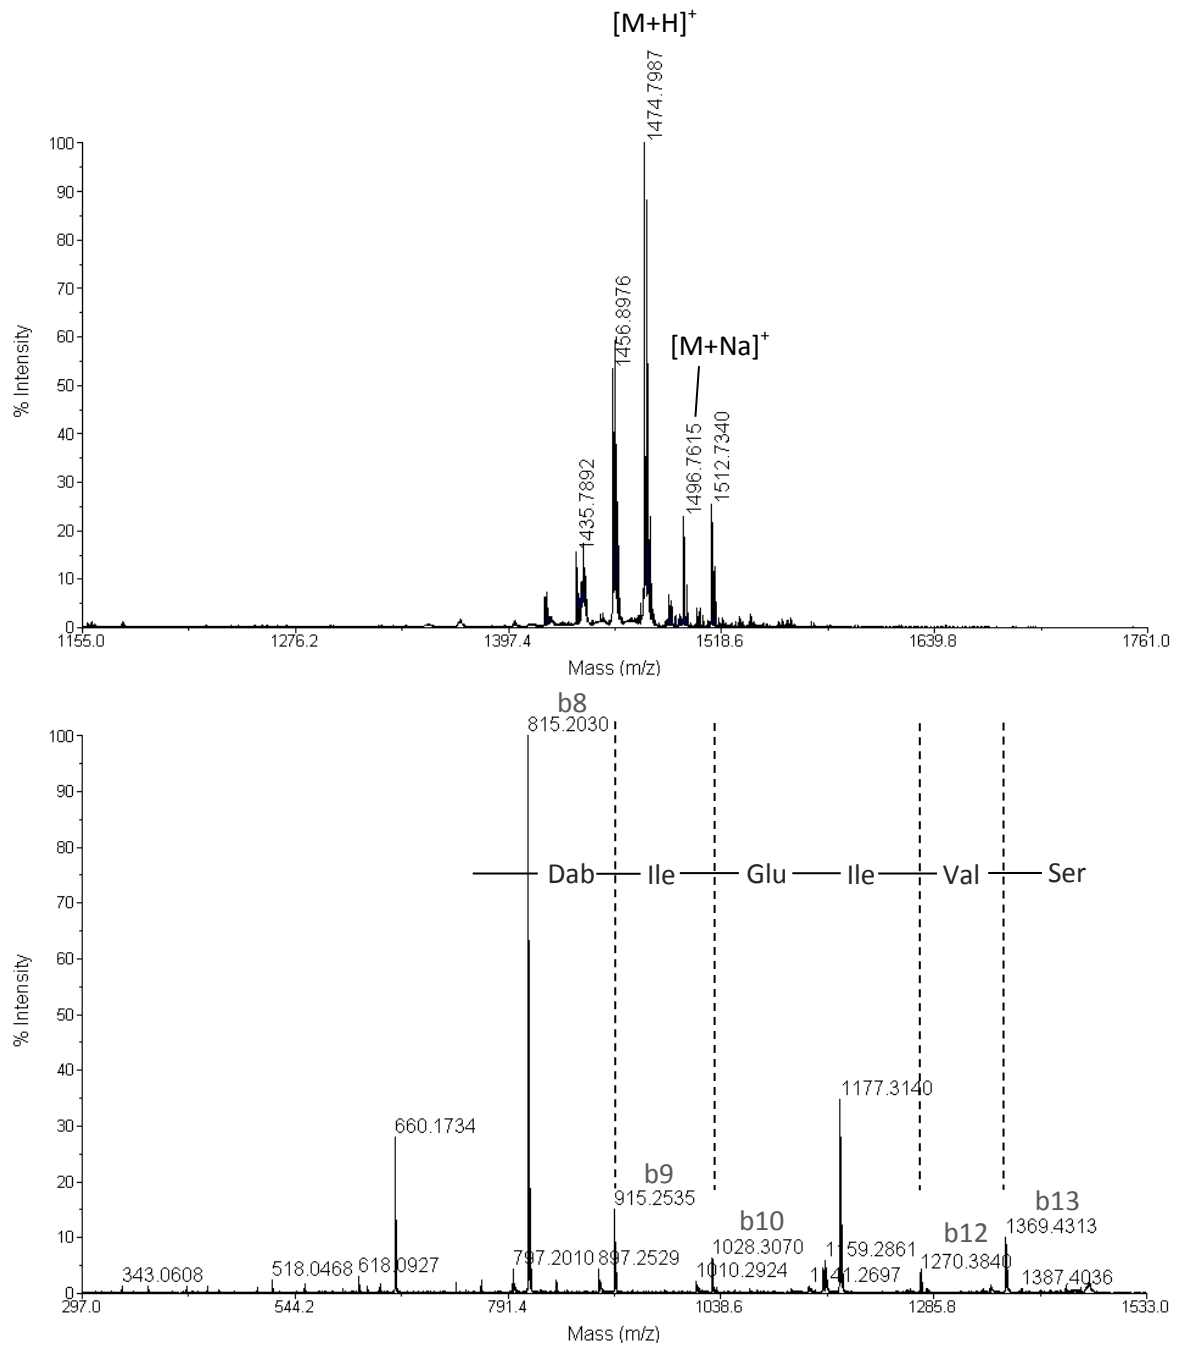

**Figure S16** Mass spectroscopic data of  $M_6$ . Top, MS data; bottom, MS/MS spectrum

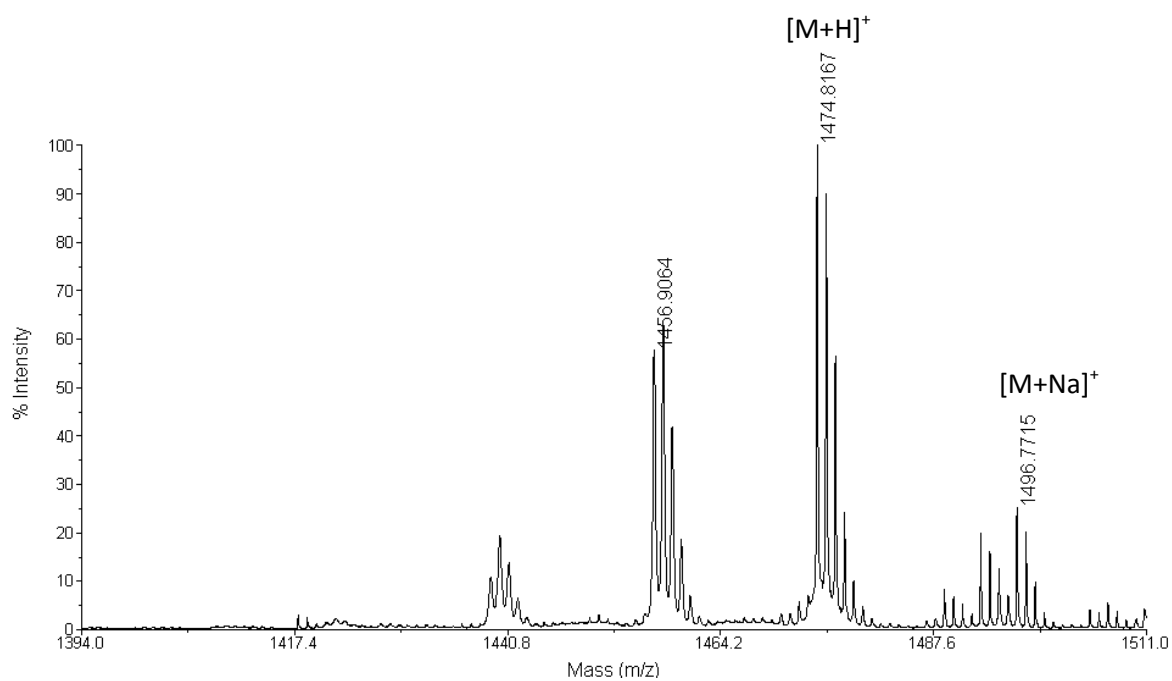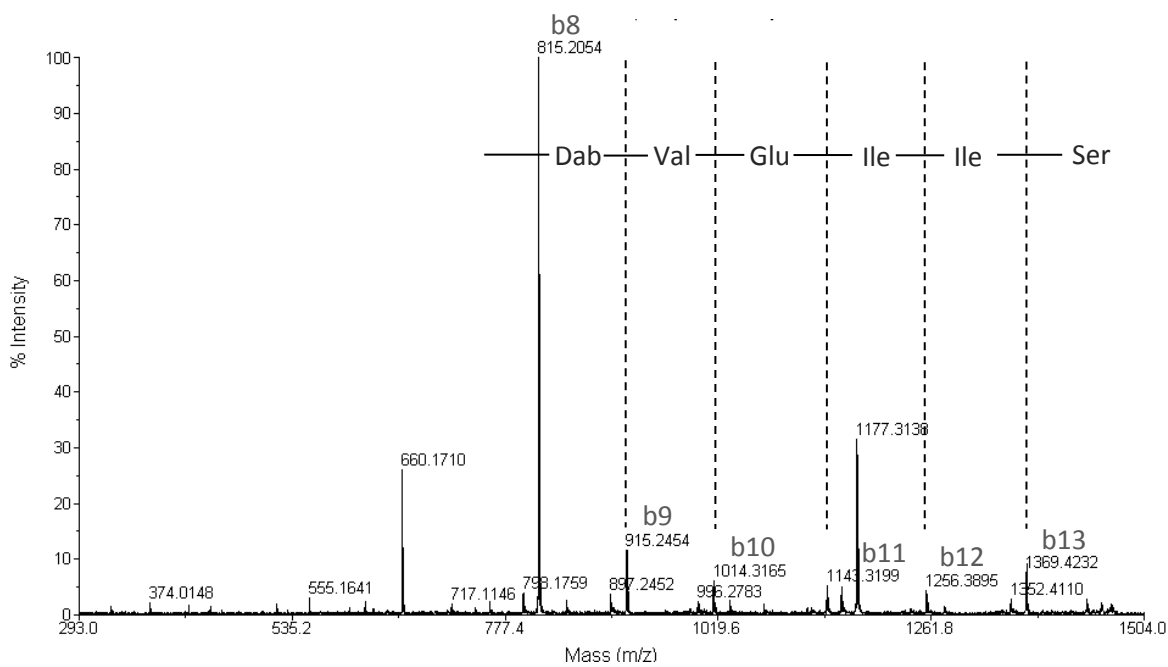

**Figure S17** Mass spectroscopic data of M<sub>7</sub>. Top, MS data; bottom, MS/MS spectrum

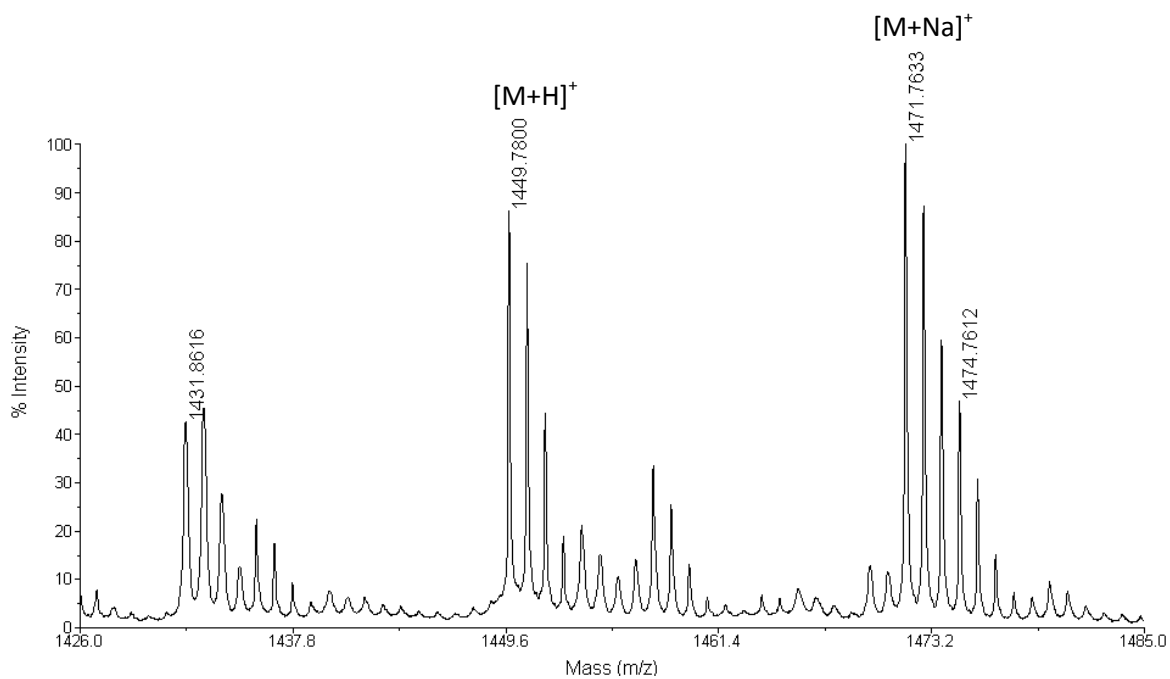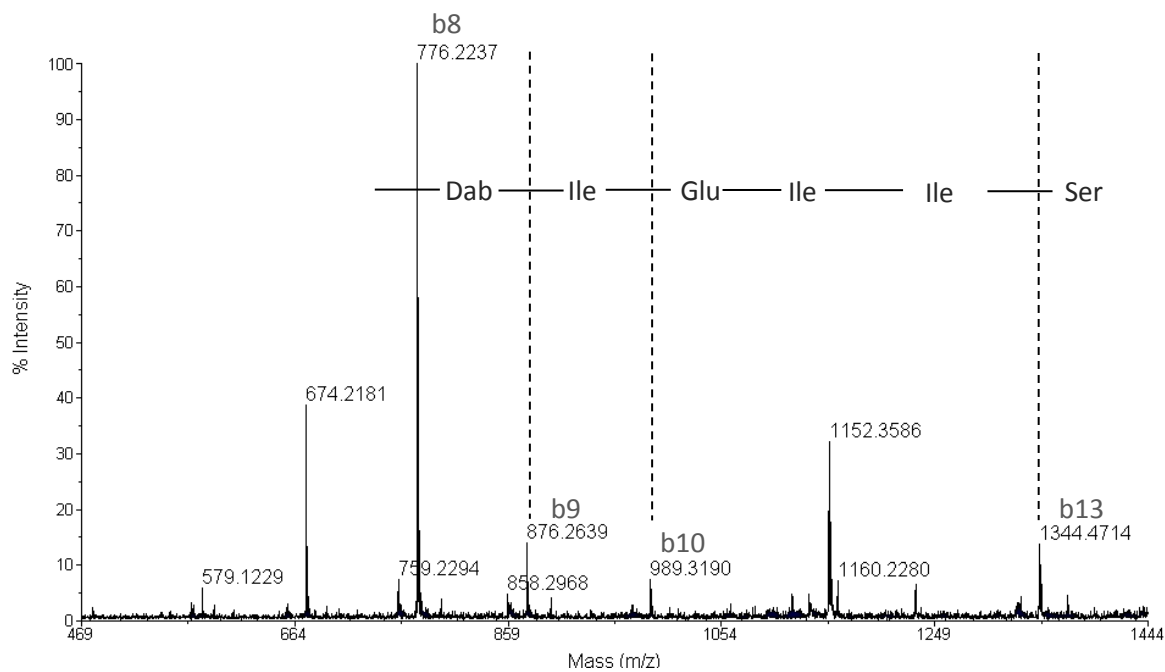

**Figure S18** Mass spectroscopic data of  $M_8$ . Top, MS data; bottom, MS/MS spectrum

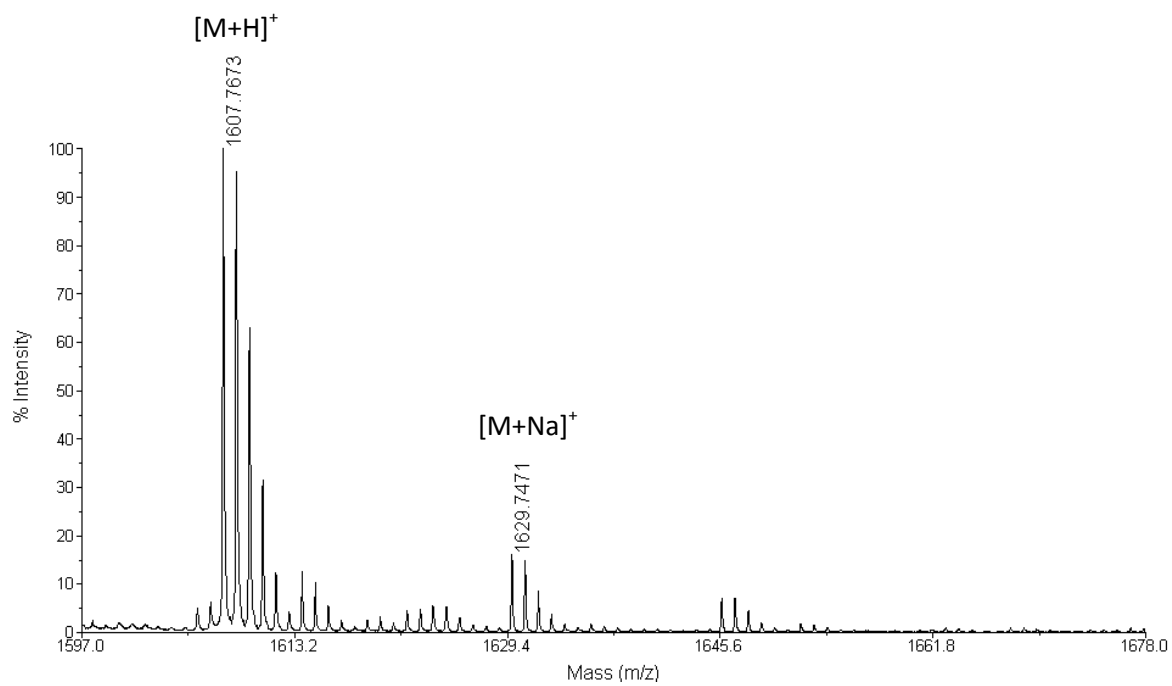

**Figure S19** Mass spectroscopic data of  $M_9$

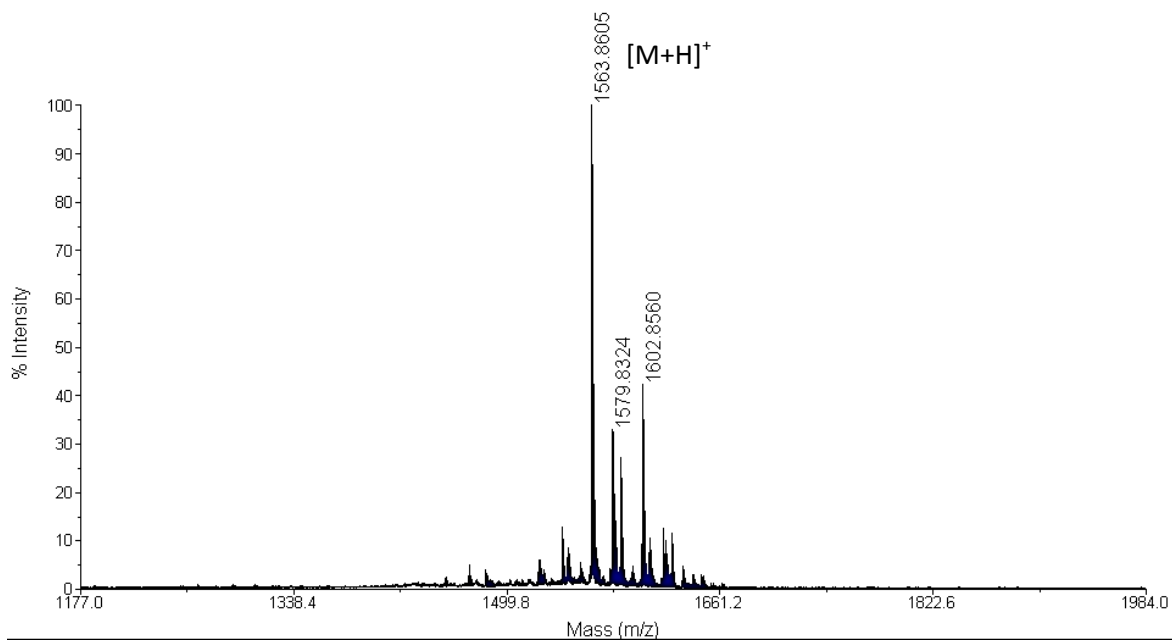

**Figure S20** Mass spectroscopic data of  $M_{10}$

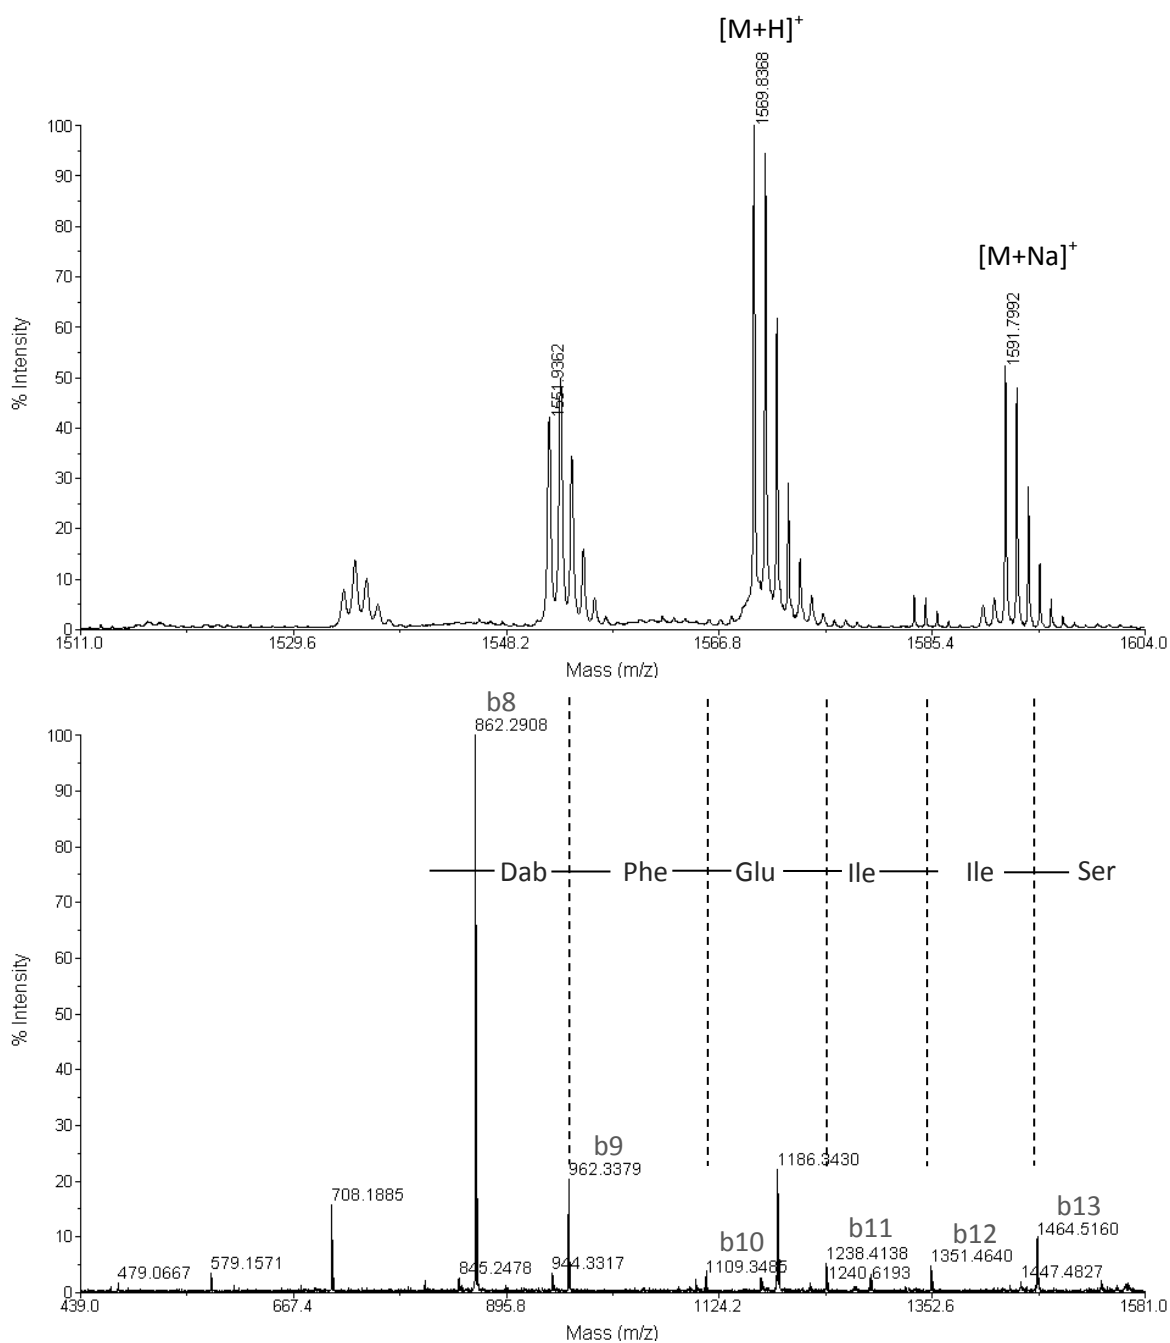

**Figure S21** Mass spectroscopic data of  $M_{11}$ . Top, MS data; bottom, MS/MS spectrum

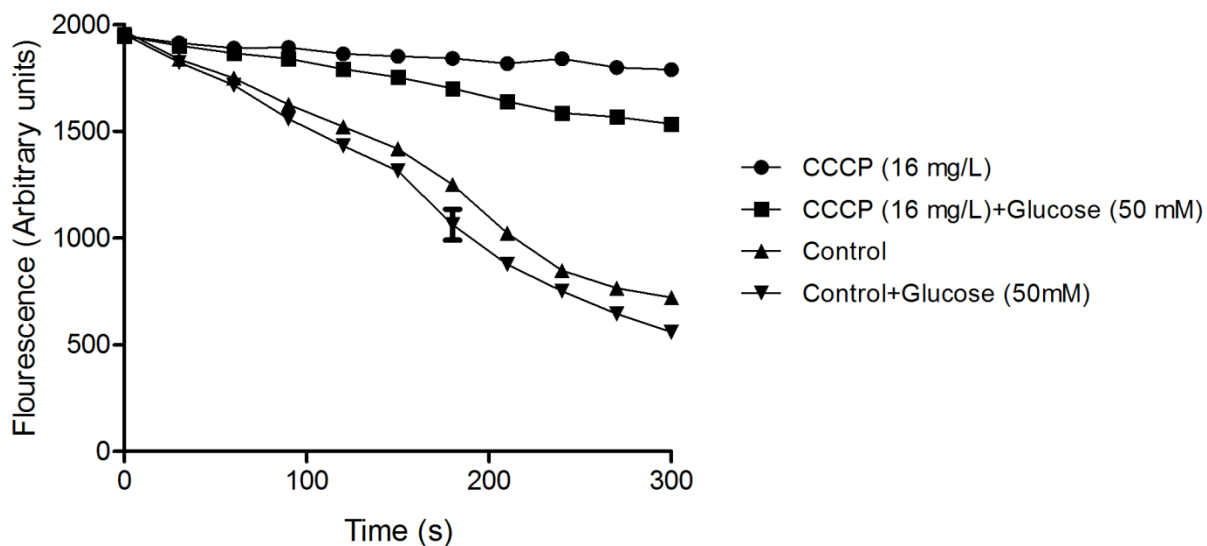

**Figure S22** Nile red efflux inhibition assay in *A. baumannii* ATCC 19606 to determine the presence of efflux pumps. *A. baumannii* was incubated with Nile red dye in the presence or absence of efflux pump inhibitor, CCCP, and the fluorescence of the intracellular dye was measured. Treated cells showed inhibition of efflux which indicates the presence of efflux pumps in the bacteria. Glucose re-energizes the efflux pumps and thereby reducing the activity of CCCP.

## References

- 1 Jangra, M. *et al.* Tridecaptin M, a new variant discovered in mud bacterium, shows activity against colistin-and extremely drug-resistant Enterobacteriaceae. *Antimicrob. Agents Chemother.* **63**, e00338-00319 (2019).
